# Supplementary material for: Energy decomposition analysis of cationic carbene analogues with group 13 and 16 elements as a central atom: a comparative study
Source: Royal Society of Chemistry journal article supplement (doi:10.1039/d1cp05884c), 2022-01-01
Supplement: d1cp05884c1.pdf [file d1cp05884c1.pdf]

## *Electronic Supplementary Information*

# Energy decomposition analysis of cationic carbene analogues with groups 13 and 16 elements as a central atom: a comparative study

Tsung-Lung Li<sup>\*,†</sup> and Wen-Cai Lu<sup>\*,‡,¶</sup>

<sup>†</sup>*Department of Electrophysics, National Chia-Yi University, Chiayi, Taiwan 60004, China*

<sup>‡</sup>*College of Physics and Laboratory of Biological Polysaccharide Fiber Forming and Ecological Textile, State Key Laboratory, Qingdao University, Qingdao, Shandong 266071, China*

<sup>¶</sup>*Institute of Theoretical Chemistry, Jilin University, Changchun, Jilin 130021, China*

E-mail: quantum@mail.ncyu.edu.tw; wencailu@jlu.edu.cn

Table S1: The analytic interaction energies  $\Delta E_{\text{int}}$  of the  $(PtBu_3)_2M^+$  reactions with (a) methane and (b) ethene are calculated by subtracting the strain energies  $\Delta E_{\text{str}}$  from the activation energies and reaction enthalpies  $\Delta E$  of the transition states and products, respectively.<sup>a</sup>.  $\Delta E_{\text{str, carb}}$ ,  $\Delta E_{\text{str, meth}}$ , and  $\Delta E_{\text{str, eth}}$  are the strain energies of the carbene, methane, and ethene fragments, respectively. Energies are in the unit of Kcal/mol.

| (a) Reactions : $(PtBu_3)_2M^+ + CH_4 \rightarrow TS-M-CH_4 \rightarrow Pro-M-CH_4$ (M = B, Al, Ga, In, Tl) |                      |                       |                       |                       |                       |                      |                       |                        |                        |                        |                        |  |
|-------------------------------------------------------------------------------------------------------------|----------------------|-----------------------|-----------------------|-----------------------|-----------------------|----------------------|-----------------------|------------------------|------------------------|------------------------|------------------------|--|
| Energy                                                                                                      | Transition States    |                       |                       |                       |                       |                      | Products              |                        |                        |                        |                        |  |
|                                                                                                             | TS-B-CH <sub>4</sub> | TS-Al-CH <sub>4</sub> | TS-Ga-CH <sub>4</sub> | TS-In-CH <sub>4</sub> | TS-Tl-CH <sub>4</sub> | TS-M-CH <sub>4</sub> | Pro-B-CH <sub>4</sub> | Pro-Al-CH <sub>4</sub> | Pro-Ga-CH <sub>4</sub> | Pro-In-CH <sub>4</sub> | Pro-Tl-CH <sub>4</sub> |  |
| $\Delta E$                                                                                                  | 28.37                | 44.62                 | 58.75                 | 72.26                 | 90.11                 |                      | -47.45                | -20.25                 | 1.68                   | 20.74                  | 44.54                  |  |
| $\Delta E_{\text{str}}$                                                                                     | 24.21                | 66.11                 | 83.12                 | 95.76                 | 112.06                |                      | 147.60                | 152.27                 | 151.69                 | 153.67                 | 150.55                 |  |
| $\Delta E_{\text{str, carb}}$                                                                               | 22.65                | 13.64                 | 14.82                 | 11.74                 | 11.36                 |                      | 31.97                 | 10.32                  | 11.08                  | 7.35                   | 3.63                   |  |
| $\Delta E_{\text{str, meth}}$                                                                               | 1.56                 | 52.47                 | 68.31                 | 84.02                 | 100.70                |                      | 115.64                | 141.95                 | 140.61                 | 146.32                 | 146.91                 |  |
| $\Delta E_{\text{int}}$                                                                                     | 4.16                 | -21.49                | -24.37                | -23.50                | -21.94                |                      | -195.06               | -172.53                | -150.01                | -132.93                | -106.01                |  |

  

| (b) Reactions : $(PtBu_3)_2M^+ + C_2H_4 \rightarrow TS-M-C_2H_4 \rightarrow Pro-M-C_2H_4$ (M = B, Al, Ga, In, Tl) |                                    |                                     |                                     |                                     |                                     |                                    |                                     |                                      |                                      |                                      |                                      |  |
|-------------------------------------------------------------------------------------------------------------------|------------------------------------|-------------------------------------|-------------------------------------|-------------------------------------|-------------------------------------|------------------------------------|-------------------------------------|--------------------------------------|--------------------------------------|--------------------------------------|--------------------------------------|--|
| Energy                                                                                                            | Transition States                  |                                     |                                     |                                     |                                     |                                    | Products                            |                                      |                                      |                                      |                                      |  |
|                                                                                                                   | TS-B-C <sub>2</sub> H <sub>4</sub> | TS-Al-C <sub>2</sub> H <sub>4</sub> | TS-Ga-C <sub>2</sub> H <sub>4</sub> | TS-In-C <sub>2</sub> H <sub>4</sub> | TS-Tl-C <sub>2</sub> H <sub>4</sub> | TS-M-C <sub>2</sub> H <sub>4</sub> | Pro-B-C <sub>2</sub> H <sub>4</sub> | Pro-Al-C <sub>2</sub> H <sub>4</sub> | Pro-Ga-C <sub>2</sub> H <sub>4</sub> | Pro-In-C <sub>2</sub> H <sub>4</sub> | Pro-Tl-C <sub>2</sub> H <sub>4</sub> |  |
| $\Delta E$                                                                                                        | 33.81                              | 3.01                                | 19.23                               | 37.52                               | 65.57                               |                                    | -39.01                              | -8.74                                | 16.72                                | 37.06                                | 65.57                                |  |
| $\Delta E_{\text{str}}$                                                                                           | 29.33                              | 18.47                               | 35.16                               | 47.83                               | 49.68                               |                                    | 66.81                               | 53.19                                | 54.44                                | 50.28                                | 49.68                                |  |
| $\Delta E_{\text{str, carb}}$                                                                                     | 28.19                              | 9.67                                | 17.84                               | 18.20                               | 17.68                               |                                    | 36.91                               | 16.14                                | 20.58                                | 20.03                                | 17.68                                |  |
| $\Delta E_{\text{str, eth}}$                                                                                      | 1.14                               | 8.80                                | 17.32                               | 29.63                               | 32.00                               |                                    | 29.90                               | 37.05                                | 33.86                                | 30.26                                | 32.00                                |  |
| $\Delta E_{\text{int}}$                                                                                           | 4.48                               | -15.46                              | -15.93                              | -10.31                              | 15.89                               |                                    | -105.82                             | -61.92                               | -37.71                               | -13.22                               | 15.89                                |  |

<sup>a</sup> All energies are calculated at the BP86/Def2-SVP theory level.

Table S2: The analytic and EDA interaction energies of the  $(PtBu_3)_2M^+$  reactions with (a) methane and (b) ethene partitioned by the ETS-NOCV<sup>a</sup> and NEDA<sup>b</sup> schemes are tabulated in the unit of Kcal/mol.

| (a) Reactions : $(PtBu_3)_2M^+ + CH_4 \rightarrow TS-M-CH_4 \rightarrow \text{Pro-M-CH}_4$ (M = B, Al, Ga, In, Tl) |                      |                       |                       |                       |                       |                      |                       |                        |                        |                        |                        |                       |
|--------------------------------------------------------------------------------------------------------------------|----------------------|-----------------------|-----------------------|-----------------------|-----------------------|----------------------|-----------------------|------------------------|------------------------|------------------------|------------------------|-----------------------|
| Energy                                                                                                             | Transition States    |                       |                       |                       |                       |                      | Products              |                        |                        |                        |                        |                       |
|                                                                                                                    | TS-B-CH <sub>4</sub> | TS-Al-CH <sub>4</sub> | TS-Ga-CH <sub>4</sub> | TS-In-CH <sub>4</sub> | TS-Tl-CH <sub>4</sub> | TS-M-CH <sub>4</sub> | Pro-B-CH <sub>4</sub> | Pro-Al-CH <sub>4</sub> | Pro-Ga-CH <sub>4</sub> | Pro-In-CH <sub>4</sub> | Pro-Tl-CH <sub>4</sub> | Pro-M-CH <sub>4</sub> |
| $\Delta E_{\text{int}}^{\text{ETS}}$                                                                               | 4.16                 | -21.49                | -24.37                | -23.50                | -21.94                | -24.37               | -195.06               | -172.53                | -150.01                | -132.93                | -106.01                | -150.01               |
| $\Delta E_{\text{int}}^{\text{ETS}}$                                                                               | 0.47                 | -19.66                | -16.95                | -20.76                | -21.73                | -16.95               | -192.68               | -169.28                | -131.34                | -124.87                | -104.14                | -131.34               |
| $\Delta E_{\text{Pauli}}^{\text{ETS}}$                                                                             | 113.84               | 170.76                | 189.08                | 187.27                | 204.56                | 189.08               | 733.93                | 451.94                 | 472.65                 | 396.87                 | 416.23                 | 472.65                |
| $\Delta E_{\text{elstat}}^{\text{ETS}}$                                                                            | -44.00               | -76.81                | -89.01                | -95.09                | -110.84               | -89.01               | -239.11               | -164.73                | -193.92                | -180.86                | -203.87                | -193.92               |
| $\Delta E_{\text{orb}}^{\text{ETS}}$                                                                               | -69.37               | -113.61               | -117.02               | -112.94               | -115.45               | -117.02              | -687.50               | -456.49                | -410.07                | -340.88                | -316.49                | -410.07               |
| $ \Delta E_{\text{int}}^{\text{ETS}} - \Delta E_{\text{int}}^{\text{NEDA}} $                                       | 3.69                 | 1.83                  | 7.42                  | 2.74                  | 0.21                  | 7.42                 | 2.38                  | 3.25                   | 18.67                  | 8.06                   | 1.87                   | 18.67                 |
| $\Delta E_{\text{int}}^{\text{NEDA}}$                                                                              | 6.33                 | -19.10                | -23.41                | -21.21                | -19.77                | -23.41               | -191.16               | -169.20                | -146.33                | -129.34                | -102.78                | -146.33               |
| $\Delta E_{\text{Pauli}}^{\text{NEDA}}$                                                                            | 134.10               | 243.26                | 441.39                | 365.82                | 275.76                | 441.39               | 960.48                | 766.62                 | 872.80                 | 607.36                 | 376.17                 | 872.80                |
| $\Delta E_{\text{elstat}}^{\text{NEDA}}$                                                                           | -39.99               | -59.62                | -120.86               | -78.70                | -83.34                | -120.86              | -116.38               | -119.66                | -243.29                | -135.69                | -126.96                | -243.29               |
| $\Delta E_{\text{orb}}^{\text{NEDA}}$                                                                              | -87.77               | -202.74               | -343.94               | -308.33               | -212.19               | -343.94              | -1035.26              | -816.17                | -775.84                | -601.02                | -351.99                | -775.84               |
| $ \Delta E_{\text{int}}^{\text{NEDA}} - \Delta E_{\text{int}}^{\text{ETS}} $                                       | 2.18                 | 2.38                  | 0.96                  | 2.29                  | 2.18                  | 0.96                 | 3.90                  | 3.32                   | 3.67                   | 3.59                   | 3.23                   | 3.67                  |

  

| (b) Reactions : $(PtBu_3)_2M^+ + C_2H_4 \rightarrow TS-M-C_2H_4 \rightarrow \text{Pro-M-C}_2H_4$ (M = B, Al, Ga, In, Tl) |                                    |                                     |                                     |                                     |                                     |                                    |                                     |                                      |                                      |                                      |                                      |                                     |
|--------------------------------------------------------------------------------------------------------------------------|------------------------------------|-------------------------------------|-------------------------------------|-------------------------------------|-------------------------------------|------------------------------------|-------------------------------------|--------------------------------------|--------------------------------------|--------------------------------------|--------------------------------------|-------------------------------------|
| Energy                                                                                                                   | Transition States                  |                                     |                                     |                                     |                                     |                                    | Products                            |                                      |                                      |                                      |                                      |                                     |
|                                                                                                                          | TS-B-C <sub>2</sub> H <sub>4</sub> | TS-Al-C <sub>2</sub> H <sub>4</sub> | TS-Ga-C <sub>2</sub> H <sub>4</sub> | TS-In-C <sub>2</sub> H <sub>4</sub> | TS-Tl-C <sub>2</sub> H <sub>4</sub> | TS-M-C <sub>2</sub> H <sub>4</sub> | Pro-B-C <sub>2</sub> H <sub>4</sub> | Pro-Al-C <sub>2</sub> H <sub>4</sub> | Pro-Ga-C <sub>2</sub> H <sub>4</sub> | Pro-In-C <sub>2</sub> H <sub>4</sub> | Pro-Tl-C <sub>2</sub> H <sub>4</sub> | Pro-M-C <sub>2</sub> H <sub>4</sub> |
| $\Delta E_{\text{int}}^{\text{ETS}}$                                                                                     | 4.48                               | -15.46                              | -15.93                              | -10.31                              | 15.89                               | -15.93                             | -105.82                             | -61.92                               | -37.71                               | -13.22                               | 15.89                                | -37.71                              |
| $\Delta E_{\text{int}}^{\text{ETS}}$                                                                                     | 5.69                               | -12.90                              | -2.94                               | -6.96                               | 15.90                               | -2.94                              | -102.01                             | -58.99                               | -19.82                               | -9.73                                | 15.90                                | -19.82                              |
| $\Delta E_{\text{Pauli}}^{\text{ETS}}$                                                                                   | 50.44                              | 174.35                              | 271.05                              | 315.77                              | 280.19                              | 271.05                             | 802.93                              | 447.86                               | 431.05                               | 330.96                               | 280.19                               | 431.05                              |
| $\Delta E_{\text{elstat}}^{\text{ETS}}$                                                                                  | -21.30                             | -91.23                              | -138.71                             | -164.47                             | -150.66                             | -138.71                            | -342.11                             | -218.19                              | -210.07                              | -171.88                              | -150.66                              | -210.07                             |
| $\Delta E_{\text{orb}}^{\text{ETS}}$                                                                                     | -23.46                             | -96.01                              | -135.27                             | -158.26                             | -113.63                             | -135.27                            | -562.84                             | -288.66                              | -240.80                              | -168.81                              | -113.63                              | -240.80                             |
| $ \Delta E_{\text{int}}^{\text{ETS}} - \Delta E_{\text{int}}^{\text{NEDA}} $                                             | 1.21                               | 2.56                                | 12.99                               | 3.35                                | 0.01                                | 12.99                              | 3.81                                | 2.93                                 | 17.89                                | 3.49                                 | 0.01                                 | 17.89                               |
| $\Delta E_{\text{int}}^{\text{NEDA}}$                                                                                    | 7.24                               | -12.34                              | -12.32                              | -7.20                               | 18.99                               | -12.32                             | -100.27                             | -58.24                               | -33.50                               | -9.94                                | 18.99                                | -33.50                              |
| $\Delta E_{\text{Pauli}}^{\text{NEDA}}$                                                                                  | 97.26                              | 244.30                              | 506.41                              | 407.77                              | 408.72                              | 506.41                             | 786.41                              | 473.57                               | 590.49                               | 407.81                               | 408.72                               | 590.49                              |
| $\Delta E_{\text{elstat}}^{\text{NEDA}}$                                                                                 | -36.27                             | -97.27                              | -196.68                             | -148.90                             | -140.63                             | -196.68                            | -224.14                             | -177.42                              | -271.07                              | -154.14                              | -140.63                              | -271.07                             |
| $\Delta E_{\text{orb}}^{\text{NEDA}}$                                                                                    | -53.75                             | -159.37                             | -322.05                             | -266.08                             | -249.10                             | -322.05                            | -662.54                             | -354.39                              | -352.91                              | -263.62                              | -249.10                              | -352.91                             |
| $ \Delta E_{\text{int}}^{\text{NEDA}} - \Delta E_{\text{int}}^{\text{ETS}} $                                             | 2.75                               | 3.12                                | 3.61                                | 3.11                                | 3.09                                | 3.61                               | 5.55                                | 3.68                                 | 4.21                                 | 3.28                                 | 3.09                                 | 4.21                                |

<sup>a</sup> The ETS-NOCV decompositions of the interaction energies are obtained at the BP86/TZ2P//BP86/Def2-SVP theory level with ZORA,  $\Delta E_{\text{int}}^{\text{ETS}} = \Delta E_{\text{int}}^{\text{ETS}} + \Delta E_{\text{Pauli}}^{\text{ETS}} + \Delta E_{\text{elstat}}^{\text{ETS}} + \Delta E_{\text{orb}}^{\text{ETS}}$

<sup>b</sup> The NEDA decompositions of the interaction energies are calculated at the BP86/Def2-SVP theory level,  $\Delta E_{\text{int}}^{\text{NEDA}} = \Delta E_{\text{int}}^{\text{NEDA}} + \Delta E_{\text{Pauli}}^{\text{NEDA}} + \Delta E_{\text{elstat}}^{\text{NEDA}} + \Delta E_{\text{orb}}^{\text{NEDA}}$

Table S3: The analytic interaction energies  $\Delta E_{\text{int}}$  of the (Dipp2DAB) $M^{+2}$  reactions with (a) methane and (b) ethene are calculated by subtracting the strain energies  $\Delta E_{\text{str}}$  from the activation energies and reaction enthalpies  $\Delta E$  of the transition states and products (relative to the reactant energies), respectively<sup>a</sup>.  $\Delta E_{\text{str, carb}}$ ,  $\Delta E_{\text{str, meth}}$ , and  $\Delta E_{\text{str, eth}}$  are the strain energies of the carbene, methane, and ethene fragments, respectively. Energies are in the unit of Kcal/mol.

| (a) Reactions : (Dipp2DAB) $M^{+2}$ + CH <sub>4</sub> $\rightarrow$ TS-M-CH <sub>4</sub> $\rightarrow$ Pro-M-CH <sub>4</sub> (M = O, S, Se, Te) |                                        |                      |                       |                       |                      |                                |                       |                        |                        |
|-------------------------------------------------------------------------------------------------------------------------------------------------|----------------------------------------|----------------------|-----------------------|-----------------------|----------------------|--------------------------------|-----------------------|------------------------|------------------------|
| Energy                                                                                                                                          | Transition States TS-M-CH <sub>4</sub> |                      |                       |                       |                      | Products Pro-M-CH <sub>4</sub> |                       |                        |                        |
|                                                                                                                                                 | TS-O-CH <sub>4</sub>                   | TS-S-CH <sub>4</sub> | TS-Se-CH <sub>4</sub> | TS-Te-CH <sub>4</sub> | TS-M-CH <sub>4</sub> | Pro-O-CH <sub>4</sub>          | Pro-S-CH <sub>4</sub> | Pro-Se-CH <sub>4</sub> | Pro-Te-CH <sub>4</sub> |
| $\Delta E$                                                                                                                                      | -3.61                                  | 35.18                | 30.27                 | 30.65                 | -42.61               | 4.19                           | 6.38                  | 7.01                   | 7.01                   |
| $\Delta E_{\text{str}}$                                                                                                                         | 170.94                                 | 73.86                | 79.12                 | 86.94                 | 170.94               | 174.96                         | 163.07                | 147.93                 | 147.93                 |
| $\Delta E_{\text{str, carb}}$                                                                                                                   | 27.12                                  | 27.02                | 23.06                 | 17.09                 | 34.95                | 62.47                          | 43.88                 | 21.79                  | 21.79                  |
| $\Delta E_{\text{str, meth}}$                                                                                                                   | 143.82                                 | 46.84                | 56.05                 | 69.85                 | 135.99               | 112.48                         | 119.19                | 126.14                 | 126.14                 |
| $\Delta E_{\text{int}}$                                                                                                                         | -171.13                                | -40.65               | -43.81                | -52.92                | -208.48              | -171.10                        | -149.43               | -136.50                | -136.50                |

  

| (b) Reactions : (Dipp2DAB) $M^{+2}$ + C <sub>2</sub> H <sub>4</sub> $\rightarrow$ TS-M-C <sub>2</sub> H <sub>4</sub> $\rightarrow$ Pro-M-C <sub>2</sub> H <sub>4</sub> (M = O, S, Se, Te) |                                                      |                                    |                                     |                                     |                                    |                                              |                                     |                                      |                                      |
|-------------------------------------------------------------------------------------------------------------------------------------------------------------------------------------------|------------------------------------------------------|------------------------------------|-------------------------------------|-------------------------------------|------------------------------------|----------------------------------------------|-------------------------------------|--------------------------------------|--------------------------------------|
| Energy                                                                                                                                                                                    | Transition States TS-M-C <sub>2</sub> H <sub>4</sub> |                                    |                                     |                                     |                                    | Products Pro-M-C <sub>2</sub> H <sub>4</sub> |                                     |                                      |                                      |
|                                                                                                                                                                                           | TS-O-C <sub>2</sub> H <sub>4</sub>                   | TS-S-C <sub>2</sub> H <sub>4</sub> | TS-Se-C <sub>2</sub> H <sub>4</sub> | TS-Te-C <sub>2</sub> H <sub>4</sub> | TS-M-C <sub>2</sub> H <sub>4</sub> | Pro-O-C <sub>2</sub> H <sub>4</sub>          | Pro-S-C <sub>2</sub> H <sub>4</sub> | Pro-Se-C <sub>2</sub> H <sub>4</sub> | Pro-Te-C <sub>2</sub> H <sub>4</sub> |
| $\Delta E$                                                                                                                                                                                | -1.18                                                | -9.11                              | -17.76                              | -23.70                              | -56.51                             | -13.10                                       | -20.92                              | -24.56                               | -24.56                               |
| $\Delta E_{\text{str}}$                                                                                                                                                                   | 15.13                                                | 25.53                              | 30.09                               | 10.49                               | 137.89                             | 80.90                                        | 6.87                                | 10.06                                | 10.06                                |
| $\Delta E_{\text{str, carb}}$                                                                                                                                                             | 13.72                                                | 22.29                              | 23.10                               | 9.10                                | 37.99                              | 63.37                                        | 6.17                                | 8.73                                 | 8.73                                 |
| $\Delta E_{\text{str, eth}}$                                                                                                                                                              | 1.40                                                 | 3.24                               | 7.00                                | 1.39                                | 99.90                              | 17.52                                        | 0.70                                | 1.33                                 | 1.33                                 |
| $\Delta E_{\text{int}}$                                                                                                                                                                   | -13.89                                               | -35.52                             | -43.87                              | -31.64                              | -186.11                            | -94.26                                       | -24.98                              | -32.04                               | -32.04                               |

<sup>a</sup> All energies are calculated at the BP86/Def2-SVP theory level.

Table S4: The analytic and EDA interaction energies of the (Dipp<sub>2</sub>DAB)M<sup>+2</sup> reactions with (a) methane and (b) ethene partitioned by the ETS-NOCV<sup>a</sup> and NEDA<sup>b</sup> schemes are tabulated in the unit of Kcal/mol.

| (a) Reactions : (Dipp <sub>2</sub> DAB)M <sup>+2</sup> + CH <sub>4</sub> → TS-M-CH <sub>4</sub> → Pro-M-CH <sub>4</sub> (M = O, S, Se, Te) |                                        |                      |                       |                       |                       |                       |                                |                        |                       |                        |                        |
|--------------------------------------------------------------------------------------------------------------------------------------------|----------------------------------------|----------------------|-----------------------|-----------------------|-----------------------|-----------------------|--------------------------------|------------------------|-----------------------|------------------------|------------------------|
| Energy                                                                                                                                     | Transition States TS-M-CH <sub>4</sub> |                      |                       |                       |                       |                       | Products Pro-M-CH <sub>4</sub> |                        |                       |                        |                        |
|                                                                                                                                            | TS-O-CH <sub>4</sub>                   | TS-S-CH <sub>4</sub> | TS-Se-CH <sub>4</sub> | TS-Te-CH <sub>4</sub> | Pro-O-CH <sub>4</sub> | Pro-S-CH <sub>4</sub> | Pro-Se-CH <sub>4</sub>         | Pro-Te-CH <sub>4</sub> | Pro-S-CH <sub>4</sub> | Pro-Se-CH <sub>4</sub> | Pro-Te-CH <sub>4</sub> |
| $\Delta E_{\text{int}}^{\text{TS}}$                                                                                                        | -174.55                                | -38.68               | -48.84                | -56.29                | -213.54               | -170.77               | -156.69                        | -140.92                | -170.77               | -156.69                | -140.92                |
| $\Delta E_{\text{int}}^{\text{ETS}}$                                                                                                       | -171.13                                | -40.65               | -43.81                | -52.92                | -208.48               | -171.10               | -149.43                        | -136.50                | -171.10               | -149.43                | -136.50                |
| $\Delta E_{\text{Pauli}}^{\text{ETS}}$                                                                                                     | 414.01                                 | 293.18               | 265.59                | 241.13                | 671.41                | 623.99                | 560.48                         | 476.64                 | 623.99                | 560.48                 | 476.64                 |
| $\Delta E_{\text{elstat}}^{\text{ETS}}$                                                                                                    | -183.96                                | -124.79              | -126.51               | -123.77               | -294.05               | -247.00               | -243.08                        | -236.14                | -247.00               | -243.08                | -236.14                |
| $\Delta E_{\text{orb}}^{\text{ETS}}$                                                                                                       | -392.06                                | -200.50              | -174.40               | -161.46               | -578.56               | -540.84               | -459.25                        | -367.90                | -540.84               | -459.25                | -367.90                |
| $\Delta E_{\text{disp}}^{\text{ETS}}$                                                                                                      | -9.12                                  | -8.54                | -8.49                 | -8.82                 | -7.29                 | -7.25                 | -7.58                          | -9.10                  | -7.25                 | -7.58                  | -9.10                  |
| $ \Delta E_{\text{int}}^{\text{ETS}} - \Delta E_{\text{int}}^{\text{NEDA}} $                                                               | 3.42                                   | 1.97                 | 5.03                  | 3.37                  | 5.06                  | 0.33                  | 7.26                           | 4.42                   | 0.33                  | 7.26                   | 4.42                   |
| $\Delta E_{\text{int}}^{\text{NEDA}}$                                                                                                      | -168.47                                | -34.71               | -44.99                | -52.61                | -207.26               | -164.83               | -151.05                        | -136.62                | -164.83               | -151.05                | -136.62                |
| $\Delta E_{\text{Pauli}}^{\text{NEDA}}$                                                                                                    | 1005.44                                | 422.82               | 406.45                | 298.69                | 1211.91               | 1065.72               | 714.85                         | 713.92                 | 1065.72               | 714.85                 | 713.92                 |
| $\Delta E_{\text{elstat}}^{\text{NEDA}}$                                                                                                   | -189.72                                | -104.99              | -146.31               | -85.68                | -249.23               | -161.89               | -181.50                        | -115.33                | -161.89               | -181.50                | -115.33                |
| $\Delta E_{\text{orb}}^{\text{NEDA}}$                                                                                                      | -976.09                                | -345.56              | -298.26               | -258.16               | -1164.06              | -1064.62              | -679.99                        | -727.75                | -1064.62              | -679.99                | -727.75                |
| $\Delta E_{\text{disp}}^{\text{NEDA}}$                                                                                                     | -8.10                                  | -6.98                | -6.86                 | -7.45                 | -5.88                 | -4.04                 | -4.41                          | -7.46                  | -4.04                 | -4.41                  | -7.46                  |
| $ \Delta E_{\text{int}}^{\text{NEDA}} - \Delta E_{\text{int}}^{\text{ETS}} $                                                               | 6.08                                   | 3.97                 | 3.85                  | 3.68                  | 6.28                  | 5.94                  | 5.64                           | 4.31                   | 5.94                  | 5.64                   | 4.31                   |

  

| (b) Reactions : (Dipp <sub>2</sub> DAB)M <sup>+2</sup> + C <sub>2</sub> H <sub>4</sub> → TS-M-C <sub>2</sub> H <sub>4</sub> → Pro-M-C <sub>2</sub> H <sub>4</sub> (M = O, S, Se, Te) |                                                      |                                    |                                     |                                     |                                     |                                     |                                              |                                      |                                     |                                      |                                      |
|--------------------------------------------------------------------------------------------------------------------------------------------------------------------------------------|------------------------------------------------------|------------------------------------|-------------------------------------|-------------------------------------|-------------------------------------|-------------------------------------|----------------------------------------------|--------------------------------------|-------------------------------------|--------------------------------------|--------------------------------------|
| Energy                                                                                                                                                                               | Transition States TS-M-C <sub>2</sub> H <sub>4</sub> |                                    |                                     |                                     |                                     |                                     | Products Pro-M-C <sub>2</sub> H <sub>4</sub> |                                      |                                     |                                      |                                      |
|                                                                                                                                                                                      | TS-O-C <sub>2</sub> H <sub>4</sub>                   | TS-S-C <sub>2</sub> H <sub>4</sub> | TS-Se-C <sub>2</sub> H <sub>4</sub> | TS-Te-C <sub>2</sub> H <sub>4</sub> | Pro-O-C <sub>2</sub> H <sub>4</sub> | Pro-S-C <sub>2</sub> H <sub>4</sub> | Pro-Se-C <sub>2</sub> H <sub>4</sub>         | Pro-Te-C <sub>2</sub> H <sub>4</sub> | Pro-S-C <sub>2</sub> H <sub>4</sub> | Pro-Se-C <sub>2</sub> H <sub>4</sub> | Pro-Te-C <sub>2</sub> H <sub>4</sub> |
| $\Delta E_{\text{int}}^{\text{TS}}$                                                                                                                                                  | -16.31                                               | -34.64                             | -47.85                              | -34.19                              | -194.41                             | -94.00                              | -27.79                                       | -34.61                               | -94.00                              | -27.79                               | -34.61                               |
| $\Delta E_{\text{int}}^{\text{ETS}}$                                                                                                                                                 | -13.89                                               | -35.52                             | -43.87                              | -31.64                              | -186.11                             | -94.26                              | -24.98                                       | -32.04                               | -94.26                              | -24.98                               | -32.04                               |
| $\Delta E_{\text{Pauli}}^{\text{ETS}}$                                                                                                                                               | 54.47                                                | 178.71                             | 260.29                              | 77.81                               | 815.37                              | 580.21                              | 56.13                                        | 76.15                                | 580.21                              | 56.13                                | 76.15                                |
| $\Delta E_{\text{elstat}}^{\text{ETS}}$                                                                                                                                              | -23.16                                               | -82.81                             | -128.86                             | -43.29                              | -367.15                             | -253.57                             | -30.23                                       | -42.55                               | -253.57                             | -30.23                               | -42.55                               |
| $\Delta E_{\text{orb}}^{\text{ETS}}$                                                                                                                                                 | -34.56                                               | -120.82                            | -165.08                             | -55.28                              | -623.94                             | -410.25                             | -39.76                                       | -54.66                               | -410.25                             | -39.76                               | -54.66                               |
| $\Delta E_{\text{disp}}^{\text{ETS}}$                                                                                                                                                | -10.64                                               | -10.60                             | -10.23                              | -10.88                              | -10.38                              | -10.66                              | -11.10                                       | -10.98                               | -10.66                              | -11.10                               | -10.98                               |
| $ \Delta E_{\text{int}}^{\text{ETS}} - \Delta E_{\text{int}}^{\text{NEDA}} $                                                                                                         | 2.42                                                 | 0.88                               | 3.98                                | 2.55                                | 8.30                                | 0.26                                | 2.81                                         | 2.57                                 | 0.26                                | 2.81                                 | 2.57                                 |
| $\Delta E_{\text{int}}^{\text{NEDA}}$                                                                                                                                                | -12.44                                               | -30.71                             | -43.23                              | -30.14                              | -185.81                             | -87.21                              | -24.36                                       | -31.02                               | -87.21                              | -24.36                               | -31.02                               |
| $\Delta E_{\text{Pauli}}^{\text{NEDA}}$                                                                                                                                              | 139.73                                               | 267.91                             | 359.13                              | 123.66                              | 1424.17                             | 618.98                              | 110.03                                       | 122.34                               | 618.98                              | 110.03                               | 122.34                               |
| $\Delta E_{\text{elstat}}^{\text{NEDA}}$                                                                                                                                             | -44.55                                               | -99.62                             | -141.09                             | -56.91                              | -391.45                             | -185.11                             | -56.69                                       | -62.21                               | -185.11                             | -56.69                               | -62.21                               |
| $\Delta E_{\text{orb}}^{\text{NEDA}}$                                                                                                                                                | -98.03                                               | -189.21                            | -252.77                             | -87.60                              | -1209.75                            | -513.54                             | -67.83                                       | -87.33                               | -513.54                             | -67.83                               | -87.33                               |
| $\Delta E_{\text{disp}}^{\text{NEDA}}$                                                                                                                                               | -9.58                                                | -9.79                              | -8.49                               | -9.29                               | -8.77                               | -7.53                               | -9.88                                        | -9.82                                | -7.53                               | -9.88                                | -9.82                                |
| $ \Delta E_{\text{int}}^{\text{NEDA}} - \Delta E_{\text{int}}^{\text{ETS}} $                                                                                                         | 3.87                                                 | 3.93                               | 4.63                                | 4.05                                | 8.60                                | 6.79                                | 3.43                                         | 3.59                                 | 6.79                                | 3.43                                 | 3.59                                 |

<sup>a</sup> The ETS-NOCV decompositions of the interaction energies are obtained at the BP86/TZ2P//BP86/Def2-SVP theory level with ZORA,

$\Delta E_{\text{int}}^{\text{ETS}} = \Delta E_{\text{Pauli}}^{\text{ETS}} + \Delta E_{\text{elstat}}^{\text{ETS}} + \Delta E_{\text{orb}}^{\text{ETS}} + \Delta E_{\text{disp}}^{\text{ETS}}$

<sup>b</sup> The NEDA decompositions of the interaction energies are calculated at the BP86/Def2-SVP theory level,

$\Delta E_{\text{int}}^{\text{NEDA}} = \Delta E_{\text{Pauli}}^{\text{NEDA}} + \Delta E_{\text{elstat}}^{\text{NEDA}} + \Delta E_{\text{orb}}^{\text{NEDA}} + \Delta E_{\text{disp}}^{\text{NEDA}}$

To qualitatively compare the variation trends of the energies data listed in Tables S1 and S2 (S3 and S4), the numbers in the two tables are converted into the “charts of variation trends” in Tables S5 and S6 (S7 and S8), respectively. The energy entry under the structure  $\Delta E(\text{Complex-M}_2)$  is replaced by one of the four notations  $\{+, -, 0(+), 0(-)\}$ , depending on the value of the energy variation (EV),

$$EV = \Delta E(\text{Complex-M}_2) - \Delta E(\text{Complex-M}_1) ,$$

where Complex-M<sub>1</sub> and Complex-M<sub>2</sub> are the structures with elements M<sub>1</sub> and M<sub>2</sub> as the central atoms, respectively, and M<sub>1</sub> is the lighter neighboring element of M<sub>2</sub> of the same group of elements. The variation trend of Complex-M<sub>2</sub> is denoted by one of the four symbols below,

$$\text{Symbol} = \begin{cases} + & \text{if } EV \in (0.5, -\infty) \\ 0(+)& \text{if } EV \in [0, 0.5] \\ 0(-)& \text{if } EV \in [-0.5, 0) \\ - & \text{if } EV \in (-\infty, -0.5) \end{cases} .$$

Symbols “0(+)” and “0(−)” mean the magnitude of EV is less than 0.5 Kcal/mol., and are considered to be virtually invariant. Symbols “0(+)” and “0(−)” are interchangeable in interpreting the charts of variation trends. Additionally, at times symbols “0(+)” and “0(−)” flexibly regarded as “+” and “−”, respectively. All qualitative comparisons of the  $(PtBu_3)_2M^+$  and  $(Dipp)_2DAB)M^{+2}$  reactions in the main text are referred to the charts in Tables (S5 and S6) and (S7 and S8), respectively.

Table S5: The charts of variation trends of the analytic interaction energies and related energies are converted from Table S1 for the  $(PtBu_3)_2M^+$  reactions with (a) methane and (b) ethene.

| (a) Reactions : $(PtBu_3)_2M^+ + CH_4 \rightarrow TS-M-CH_4 \rightarrow Pro-M-CH_4$ (M = B, Al, Ga, In, Tl) |                |                       |                       |                       |                       |                      |                        |                        |                        |                        |                       |   |
|-------------------------------------------------------------------------------------------------------------|----------------|-----------------------|-----------------------|-----------------------|-----------------------|----------------------|------------------------|------------------------|------------------------|------------------------|-----------------------|---|
| Variation                                                                                                   | Remarks        | Transition States     |                       |                       |                       |                      | Products               |                        |                        |                        |                       |   |
|                                                                                                             |                | TS-Al-CH <sub>4</sub> | TS-Ga-CH <sub>4</sub> | TS-In-CH <sub>4</sub> | TS-Tl-CH <sub>4</sub> | TS-M-CH <sub>4</sub> | Pro-Al-CH <sub>4</sub> | Pro-Ga-CH <sub>4</sub> | Pro-In-CH <sub>4</sub> | Pro-Tl-CH <sub>4</sub> | Pro-M-CH <sub>4</sub> |   |
| $\Delta E$                                                                                                  |                | +                     | +                     | +                     | +                     | +                    | +                      | +                      | +                      | +                      | +                     | + |
| $\Delta E_{str}$                                                                                            | * <sup>a</sup> | +                     | +                     | +                     | +                     | +                    | -                      | +                      | +                      | -                      | +                     | - |
| $\Delta E_{str, carb}$                                                                                      | # <sup>b</sup> | -                     | +                     | -                     | 0(-)                  | -                    | +                      | -                      | -                      | +                      | -                     | - |
| $\Delta E_{str, meth}$                                                                                      |                | +                     | +                     | +                     | +                     | +                    | +                      | +                      | +                      | +                      | +                     | + |
| $\Delta E_{int}$                                                                                            |                | -                     | -                     | +                     | +                     | +                    | +                      | +                      | +                      | +                      | +                     | + |

  

| (b) Reactions : $(PtBu_3)_2M^+ + C_2H_4 \rightarrow TS-M-C_2H_4 \rightarrow Pro-M-C_2H_4$ (M = B, Al, Ga, In, Tl) |         |                                     |                                     |                                     |                                     |                                    |                                      |                                      |                                      |                                      |                                     |   |
|-------------------------------------------------------------------------------------------------------------------|---------|-------------------------------------|-------------------------------------|-------------------------------------|-------------------------------------|------------------------------------|--------------------------------------|--------------------------------------|--------------------------------------|--------------------------------------|-------------------------------------|---|
| Variation                                                                                                         | Remarks | Transition States                   |                                     |                                     |                                     |                                    | Products                             |                                      |                                      |                                      |                                     |   |
|                                                                                                                   |         | TS-Al-C <sub>2</sub> H <sub>4</sub> | TS-Ga-C <sub>2</sub> H <sub>4</sub> | TS-In-C <sub>2</sub> H <sub>4</sub> | TS-Tl-C <sub>2</sub> H <sub>4</sub> | TS-M-C <sub>2</sub> H <sub>4</sub> | Pro-Al-C <sub>2</sub> H <sub>4</sub> | Pro-Ga-C <sub>2</sub> H <sub>4</sub> | Pro-In-C <sub>2</sub> H <sub>4</sub> | Pro-Tl-C <sub>2</sub> H <sub>4</sub> | Pro-M-C <sub>2</sub> H <sub>4</sub> |   |
| $\Delta E$                                                                                                        |         | -                                   | +                                   | +                                   | +                                   | +                                  | +                                    | +                                    | +                                    | +                                    | +                                   | + |
| $\Delta E_{str}$                                                                                                  | *       | -                                   | +                                   | +                                   | +                                   | +                                  | -                                    | +                                    | -                                    | +                                    | -                                   | - |
| $\Delta E_{str, carb}$                                                                                            |         | -                                   | +                                   | 0(+)                                | -                                   | -                                  | -                                    | +                                    | -                                    | +                                    | -                                   | - |
| $\Delta E_{str, eth}$                                                                                             |         | +                                   | +                                   | +                                   | +                                   | +                                  | +                                    | +                                    | -                                    | -                                    | +                                   | + |
| $\Delta E_{int}$                                                                                                  |         | -                                   | 0(-)                                | +                                   | +                                   | +                                  | +                                    | +                                    | +                                    | +                                    | +                                   | + |

<sup>a</sup> Symbol “\*” means the variation trend of the specified energy is same as  $\Delta E$ .

<sup>b</sup> Symbol “#” means the variation trend of the specified energy is same as  $\Delta E_{str}$ .

Table S6: The charts of variation trends of the analytic and EDA interaction energies and their ETS-NOCV and NEDA partitions are converted from Table S2 for the  $(PtBu_3)_2M^+$  reactions with (a) methane and (b) ethene.

| (a) Reactions : $(PtBu_3)_2M^+ + CH_4 \rightarrow TS-M-CH_4 \rightarrow Pro-M-CH_4$ (M = B, Al, Ga, In, Tl) |         |                       |                       |                       |                       |                |                        |                        |                        |                       |                        |   |
|-------------------------------------------------------------------------------------------------------------|---------|-----------------------|-----------------------|-----------------------|-----------------------|----------------|------------------------|------------------------|------------------------|-----------------------|------------------------|---|
| Variation                                                                                                   | Remarks | Transition States     |                       |                       |                       | Remarks        | Products               |                        |                        |                       |                        |   |
|                                                                                                             |         | TS-Al-CH <sub>4</sub> | TS-Ga-CH <sub>4</sub> | TS-In-CH <sub>4</sub> | TS-Tl-CH <sub>4</sub> |                | Pro-Al-CH <sub>4</sub> | Pro-Ga-CH <sub>4</sub> | Pro-In-CH <sub>4</sub> | Pro-M-CH <sub>4</sub> | Pro-Tl-CH <sub>4</sub> |   |
| $\Delta E_{int}^{\text{ETS}}$                                                                               | -       | -                     | -                     | +                     | +                     | +              | +                      | +                      | +                      | +                     | +                      | + |
| $\Delta E_{int}^{\text{Pauli}}$                                                                             | -       | +                     | +                     | -                     | -                     | * <sup>a</sup> | +                      | +                      | +                      | +                     | +                      | + |
| $\Delta E_{elstat}^{\text{ETS}}$                                                                            | +       | +                     | -                     | -                     | +                     |                | -                      | +                      | -                      | +                     | -                      | + |
| $\Delta E_{orb}^{\text{ETS}}$                                                                               | -       | -                     | -                     | -                     | -                     | *              | +                      | +                      | +                      | +                     | +                      | + |
| $\Delta E_{int}^{\text{NEDA}}$                                                                              | *       | -                     | -                     | +                     | +                     | *              | +                      | +                      | +                      | +                     | +                      | + |
| $\Delta E_{Pauli}^{\text{NEDA}}$                                                                            | +       | +                     | +                     | -                     | -                     |                | -                      | +                      | -                      | +                     | -                      | - |
| $\Delta E_{elstat}^{\text{NEDA}}$                                                                           | -       | -                     | -                     | +                     | +                     |                | -                      | -                      | +                      | -                     | +                      | + |
| $\Delta E_{orb}^{\text{NEDA}}$                                                                              | -       | -                     | -                     | +                     | +                     | *              | +                      | +                      | +                      | +                     | +                      | + |

  

| (b) Reactions : $(PtBu_3)_2M^+ + C_2H_4 \rightarrow TS-M-C_2H_4 \rightarrow Pro-M-C_2H_4$ (M = B, Al, Ga, In, Tl) |         |                                     |                                     |                                     |                                     |         |                                      |                                      |                                      |                                     |                                      |   |
|-------------------------------------------------------------------------------------------------------------------|---------|-------------------------------------|-------------------------------------|-------------------------------------|-------------------------------------|---------|--------------------------------------|--------------------------------------|--------------------------------------|-------------------------------------|--------------------------------------|---|
| Variation                                                                                                         | Remarks | Transition States                   |                                     |                                     |                                     | Remarks | Products                             |                                      |                                      |                                     |                                      |   |
|                                                                                                                   |         | TS-Al-C <sub>2</sub> H <sub>4</sub> | TS-Ga-C <sub>2</sub> H <sub>4</sub> | TS-In-C <sub>2</sub> H <sub>4</sub> | TS-Tl-C <sub>2</sub> H <sub>4</sub> |         | Pro-Al-C <sub>2</sub> H <sub>4</sub> | Pro-Ga-C <sub>2</sub> H <sub>4</sub> | Pro-In-C <sub>2</sub> H <sub>4</sub> | Pro-M-C <sub>2</sub> H <sub>4</sub> | Pro-Tl-C <sub>2</sub> H <sub>4</sub> |   |
| $\Delta E_{int}^{\text{ETS}}$                                                                                     | -       | -                                   | 0(-)                                | +                                   | +                                   |         | +                                    | +                                    | +                                    | +                                   | +                                    | + |
| $\Delta E_{int}^{\text{Pauli}}$                                                                                   | -       | +                                   | +                                   | -                                   | +                                   | *       | +                                    | +                                    | +                                    | +                                   | +                                    | + |
| $\Delta E_{elstat}^{\text{ETS}}$                                                                                  | +       | +                                   | -                                   | +                                   | -                                   |         | -                                    | -                                    | -                                    | -                                   | -                                    | - |
| $\Delta E_{orb}^{\text{ETS}}$                                                                                     | -       | -                                   | -                                   | -                                   | +                                   | *       | +                                    | +                                    | +                                    | +                                   | +                                    | + |
| $\Delta E_{int}^{\text{NEDA}}$                                                                                    | *       | -                                   | 0(+)                                | +                                   | +                                   | *       | +                                    | +                                    | +                                    | +                                   | +                                    | + |
| $\Delta E_{Pauli}^{\text{NEDA}}$                                                                                  | +       | +                                   | +                                   | -                                   | +                                   |         | -                                    | +                                    | -                                    | +                                   | -                                    | + |
| $\Delta E_{elstat}^{\text{NEDA}}$                                                                                 | -       | -                                   | -                                   | +                                   | +                                   |         | +                                    | +                                    | +                                    | +                                   | +                                    | + |
| $\Delta E_{orb}^{\text{NEDA}}$                                                                                    | -       | -                                   | -                                   | +                                   | +                                   | *       | +                                    | +                                    | +                                    | +                                   | +                                    | + |

<sup>a</sup>Symbol "es\*" means the variation trend of the specified energy is same as the analytic interaction energies  $\Delta E_{int}$ .



Table S7: The charts of variation trends of the analytic interaction energies and related energies are converted from Table S3 for the (Dipp<sub>2</sub>DAB)M<sup>+2</sup> reactions with (a) methane and (b) ethene.

| (a) Reactions : (Dipp <sub>2</sub> DAB)M <sup>+2</sup> + CH <sub>4</sub> → TS-M-CH <sub>4</sub> → Pro-M-CH <sub>4</sub> (M = O, S, Se, Te) |                                        |                      |                       |                                |                |                       |                        |                        |
|--------------------------------------------------------------------------------------------------------------------------------------------|----------------------------------------|----------------------|-----------------------|--------------------------------|----------------|-----------------------|------------------------|------------------------|
| Variation                                                                                                                                  | Transition States TS-M-CH <sub>4</sub> |                      |                       | Products Pro-M-CH <sub>4</sub> |                |                       |                        |                        |
|                                                                                                                                            | Remarks                                | TS-S-CH <sub>4</sub> | TS-Se-CH <sub>4</sub> | TS-Te-CH <sub>4</sub>          | Remarks        | Pro-S-CH <sub>4</sub> | Pro-Se-CH <sub>4</sub> | Pro-Te-CH <sub>4</sub> |
| $\Delta E$                                                                                                                                 |                                        | +                    | -                     | 0(+)                           |                | +                     | +                      | +                      |
| $\Delta E_{\text{str}}$                                                                                                                    |                                        | -                    | +                     | +                              |                | +                     | -                      | -                      |
| $\Delta E_{\text{str, carb}}$                                                                                                              |                                        | 0(-)                 | -                     | -                              | # <sup>b</sup> | +                     | -                      | -                      |
| $\Delta E_{\text{str, meth}}$                                                                                                              | #                                      | -                    | +                     | +                              |                | -                     | +                      | +                      |
| $\Delta E_{\text{int}}$                                                                                                                    |                                        | +                    | -                     | -                              | * <sup>a</sup> | +                     | +                      | +                      |

  

| (b) Reactions : (Dipp <sub>2</sub> DAB)M <sup>+2</sup> + C <sub>2</sub> H <sub>4</sub> → TS-M-C <sub>2</sub> H <sub>4</sub> → Pro-M-C <sub>2</sub> H <sub>4</sub> (M = O, S, Se, Te) |                                                      |                                    |                                     |                                              |         |                                     |                                      |                                      |
|--------------------------------------------------------------------------------------------------------------------------------------------------------------------------------------|------------------------------------------------------|------------------------------------|-------------------------------------|----------------------------------------------|---------|-------------------------------------|--------------------------------------|--------------------------------------|
| Variation                                                                                                                                                                            | Transition States TS-M-C <sub>2</sub> H <sub>4</sub> |                                    |                                     | Products Pro-M-C <sub>2</sub> H <sub>4</sub> |         |                                     |                                      |                                      |
|                                                                                                                                                                                      | Remarks                                              | TS-S-C <sub>2</sub> H <sub>4</sub> | TS-Se-C <sub>2</sub> H <sub>4</sub> | TS-Te-C <sub>2</sub> H <sub>4</sub>          | Remarks | Pro-S-C <sub>2</sub> H <sub>4</sub> | Pro-Se-C <sub>2</sub> H <sub>4</sub> | Pro-Te-C <sub>2</sub> H <sub>4</sub> |
| $\Delta E$                                                                                                                                                                           |                                                      | -                                  | -                                   | -                                            |         | +                                   | -                                    | -                                    |
| $\Delta E_{\text{str}}$                                                                                                                                                              |                                                      | +                                  | +                                   | -                                            |         | -                                   | -                                    | +                                    |
| $\Delta E_{\text{str, carb}}$                                                                                                                                                        | #                                                    | +                                  | +                                   | -                                            |         | +                                   | -                                    | +                                    |
| $\Delta E_{\text{str, eth}}$                                                                                                                                                         | #                                                    | +                                  | +                                   | -                                            | #       | -                                   | -                                    | +                                    |
| $\Delta E_{\text{int}}$                                                                                                                                                              |                                                      | -                                  | -                                   | +                                            |         | +                                   | +                                    | -                                    |

<sup>a</sup> Symbol “\*” means the variation trend of the specified energy is same as  $\Delta E$ .

<sup>b</sup> Symbol “#” means the variation trend of the specified energy is same as  $\Delta E_{\text{str}}$ .

Table S8: The charts of variation trends of the analytic and EDA interaction energies and their ETS-NOCV and NEDA partitions are converted from Table S4 for the  $(\text{Dipp}_2\text{DAB})\text{M}^{+2}$  reactions with (a) methane and (b) ethene.

| (a) Reactions : $(\text{Dipp}_2\text{DAB})\text{M}^{+2} + \text{CH}_4 \rightarrow \text{TS-M-CH}_4 \rightarrow \text{Pro-M-CH}_4$ (M = O, S, Se, Te) |                                              |                            |                             |                             |                                      |                             |                              |                              |   |
|------------------------------------------------------------------------------------------------------------------------------------------------------|----------------------------------------------|----------------------------|-----------------------------|-----------------------------|--------------------------------------|-----------------------------|------------------------------|------------------------------|---|
| Variation                                                                                                                                            | Transition States <b>TS-M-CH<sub>4</sub></b> |                            |                             |                             | Products <b>Pro-M-CH<sub>4</sub></b> |                             |                              |                              |   |
|                                                                                                                                                      | Remarks                                      | <b>TS-S-CH<sub>4</sub></b> | <b>TS-Se-CH<sub>4</sub></b> | <b>TS-Te-CH<sub>4</sub></b> | Remarks                              | <b>Pro-S-CH<sub>4</sub></b> | <b>Pro-Se-CH<sub>4</sub></b> | <b>Pro-Te-CH<sub>4</sub></b> |   |
| $\Delta E_{\text{int}}^{\text{TS}}$                                                                                                                  |                                              | +                          | -                           | -                           |                                      | +                           | +                            | +                            | + |
| $\Delta E_{\text{int}}^{\text{ETS}}$                                                                                                                 | $\ast \alpha$                                | +                          | -                           | -                           | *                                    | +                           | +                            | +                            | + |
| $\Delta E_{\text{Pauli}}^{\text{ETS}}$                                                                                                               |                                              | -                          | -                           | -                           |                                      | -                           | -                            | -                            | - |
| $\Delta E_{\text{elstat}}^{\text{ETS}}$                                                                                                              |                                              | +                          | -                           | +                           | *                                    | +                           | +                            | +                            | + |
| $\Delta E_{\text{orb}}^{\text{ETS}}$                                                                                                                 |                                              | +                          | +                           | +                           | *                                    | +                           | +                            | +                            | + |
| $\Delta E_{\text{int}}^{\text{NEDA}}$                                                                                                                | *                                            | +                          | -                           | -                           | *                                    | +                           | +                            | +                            | + |
| $\Delta E_{\text{Pauli}}^{\text{NEDA}}$                                                                                                              |                                              | -                          | -                           | -                           |                                      | -                           | -                            | -                            | - |
| $\Delta E_{\text{elstat}}^{\text{NEDA}}$                                                                                                             |                                              | +                          | -                           | +                           |                                      | +                           | -                            | +                            | + |
| $\Delta E_{\text{orb}}^{\text{NEDA}}$                                                                                                                |                                              | +                          | +                           | +                           |                                      | +                           | +                            | +                            | - |

  

| (b) Reactions : $(\text{Dipp}_2\text{DAB})\text{M}^{+2} + \text{C}_2\text{H}_4 \rightarrow \text{TS-M-C}_2\text{H}_4 \rightarrow \text{Pro-M-C}_2\text{H}_4$ (M = O, S, Se, Te) |                                                          |                                        |                                         |                                         |                                                  |                                         |                                          |                                          |      |
|---------------------------------------------------------------------------------------------------------------------------------------------------------------------------------|----------------------------------------------------------|----------------------------------------|-----------------------------------------|-----------------------------------------|--------------------------------------------------|-----------------------------------------|------------------------------------------|------------------------------------------|------|
| Variation                                                                                                                                                                       | Transition States <b>TS-M-C<sub>2</sub>H<sub>4</sub></b> |                                        |                                         |                                         | Products <b>Pro-M-C<sub>2</sub>H<sub>4</sub></b> |                                         |                                          |                                          |      |
|                                                                                                                                                                                 | Remarks                                                  | <b>TS-S-C<sub>2</sub>H<sub>4</sub></b> | <b>TS-Se-C<sub>2</sub>H<sub>4</sub></b> | <b>TS-Te-C<sub>2</sub>H<sub>4</sub></b> | Remarks                                          | <b>Pro-S-C<sub>2</sub>H<sub>4</sub></b> | <b>Pro-Se-C<sub>2</sub>H<sub>4</sub></b> | <b>Pro-Te-C<sub>2</sub>H<sub>4</sub></b> |      |
| $\Delta E_{\text{int}}^{\text{TS}}$                                                                                                                                             |                                                          | -                                      | -                                       | +                                       |                                                  | +                                       | +                                        | +                                        | -    |
| $\Delta E_{\text{int}}^{\text{ETS}}$                                                                                                                                            | *                                                        | -                                      | -                                       | +                                       | *                                                | +                                       | +                                        | +                                        | -    |
| $\Delta E_{\text{Pauli}}^{\text{ETS}}$                                                                                                                                          |                                                          | +                                      | +                                       | -                                       |                                                  | -                                       | -                                        | +                                        | +    |
| $\Delta E_{\text{elstat}}^{\text{ETS}}$                                                                                                                                         | *                                                        | -                                      | -                                       | +                                       | *                                                | +                                       | +                                        | -                                        | -    |
| $\Delta E_{\text{orb}}^{\text{ETS}}$                                                                                                                                            | *                                                        | -                                      | -                                       | +                                       | *                                                | +                                       | +                                        | -                                        | -    |
| $\Delta E_{\text{int}}^{\text{NEDA}}$                                                                                                                                           | *                                                        | -                                      | -                                       | +                                       | *                                                | +                                       | +                                        | +                                        | -    |
| $\Delta E_{\text{Pauli}}^{\text{NEDA}}$                                                                                                                                         |                                                          | +                                      | +                                       | -                                       |                                                  | -                                       | -                                        | +                                        | +    |
| $\Delta E_{\text{elstat}}^{\text{NEDA}}$                                                                                                                                        | *                                                        | -                                      | -                                       | +                                       |                                                  | +                                       | +                                        | +                                        | 0(+) |
| $\Delta E_{\text{orb}}^{\text{NEDA}}$                                                                                                                                           | *                                                        | -                                      | -                                       | +                                       | *                                                | +                                       | +                                        | +                                        | -    |

$\ast$  Symbol " $\ast$ " means the variation trend of the specified energy is same as the analytic interaction energies  $\Delta E_{\text{int}}^{\text{TS}}$ .

Table S9: The main governing effects on the variation trends of the energies listed in the second column are shown in the third column for the  $(PtBu_3)_2M^+$  reactions with (a) methane and (b) ethene and the  $(Dipp_2DAB)M^{+2}$  reactions with (c) methane and (d) ethene.<sup>a</sup>

| (a) Reactions of $(PtBu_3)_2M^+$ with $CH_4$       |                                  |                                                                |
|----------------------------------------------------|----------------------------------|----------------------------------------------------------------|
| Structures                                         | Energies                         | Main Governing Components                                      |
| Transition States                                  | $\Delta E_{\text{activ}}$        | $\Delta E_{\text{str}}$                                        |
|                                                    | $\Delta E_{\text{str}}$          | $\Delta E_{\text{str, meth}}$                                  |
|                                                    | ETS-NOCV $\Delta E_{\text{int}}$ | None                                                           |
|                                                    | NEDA $\Delta E_{\text{int}}$     | $\Delta E_{\text{orb}}$                                        |
| Products                                           | $\Delta E_{\text{react}}$        | $\Delta E_{\text{int}}$                                        |
|                                                    | $\Delta E_{\text{str}}$          | None                                                           |
|                                                    | ETS-NOCV $\Delta E_{\text{int}}$ | $\Delta E_{\text{orb}}$                                        |
|                                                    | NEDA $\Delta E_{\text{int}}$     | $\Delta E_{\text{orb}}$                                        |
| (b) Reactions of $(PtBu_3)_2M^+$ with $C_2H_4$     |                                  |                                                                |
| Structures                                         | Energies                         | Main Governing Components                                      |
| Transition States                                  | $\Delta E_{\text{activ}}$        | $\Delta E_{\text{str}}$                                        |
|                                                    | $\Delta E_{\text{str}}$          | None                                                           |
|                                                    | ETS-NOCV $\Delta E_{\text{int}}$ | None                                                           |
|                                                    | NEDA $\Delta E_{\text{int}}$     | $\Delta E_{\text{elstat}}$ and $\Delta E_{\text{orb}}$         |
| Products                                           | $\Delta E_{\text{react}}$        | $\Delta E_{\text{int}}$                                        |
|                                                    | $\Delta E_{\text{str}}$          | $\Delta E_{\text{str, carb}}$                                  |
|                                                    | ETS-NOCV $\Delta E_{\text{int}}$ | $\Delta E_{\text{elstat}}$ and $\Delta E_{\text{orb}}$         |
|                                                    | NEDA $\Delta E_{\text{int}}$     | $\Delta E_{\text{orb}}$                                        |
| (c) Reactions of $(Dipp_2DAB)M^{+2}$ with $CH_4$   |                                  |                                                                |
| Structures                                         | Energies                         | Main Governing Components                                      |
| Transition States                                  | $\Delta E_{\text{activ}}$        | $\Delta E_{\text{int}}$                                        |
|                                                    | $\Delta E_{\text{str}}$          | $\Delta E_{\text{str, meth}}$                                  |
|                                                    | ETS-NOCV $\Delta E_{\text{int}}$ | None                                                           |
|                                                    | NEDA $\Delta E_{\text{int}}$     | None                                                           |
| Products                                           | $\Delta E_{\text{react}}$        | $\Delta E_{\text{int}}$                                        |
|                                                    | $\Delta E_{\text{str}}$          | $\Delta E_{\text{str, carb}}$                                  |
|                                                    | ETS-NOCV $\Delta E_{\text{int}}$ | $\Delta E_{\text{elstat}}$ and $\Delta E_{\text{orb}}$         |
|                                                    | NEDA $\Delta E_{\text{int}}$     | None                                                           |
| (d) Reactions of $(Dipp_2DAB)M^{+2}$ with $C_2H_4$ |                                  |                                                                |
| Structures                                         | Energies                         | Main Governing Components                                      |
| Transition States                                  | $\Delta E_{\text{activ}}$        | None                                                           |
|                                                    | $\Delta E_{\text{str}}$          | $\Delta E_{\text{str, carb}}$ and $\Delta E_{\text{str, eth}}$ |
|                                                    | ETS-NOCV $\Delta E_{\text{int}}$ | $\Delta E_{\text{elstat}}$ and $\Delta E_{\text{orb}}$         |
|                                                    | NEDA $\Delta E_{\text{int}}$     | $\Delta E_{\text{elstat}}$ and $\Delta E_{\text{orb}}$         |
| Products                                           | $\Delta E_{\text{react}}$        | None                                                           |
|                                                    | $\Delta E_{\text{str}}$          | $\Delta E_{\text{str, eth}}$                                   |
|                                                    | ETS-NOCV $\Delta E_{\text{int}}$ | $\Delta E_{\text{elstat}}$ and $\Delta E_{\text{orb}}$         |
|                                                    | NEDA $\Delta E_{\text{int}}$     | $\Delta E_{\text{orb}}$                                        |

<sup>a</sup>  $\Delta E_{\text{activ}}$  and  $\Delta E_{\text{react}}$  are the activation energies and reaction enthalpies of the transition states and products, respectively. All other notations in the table are explicated in Eqs. (1) and (3) of the main text.
